# Supplementary material for: Investigation of the impact of magnesiumversustitanium implants on protein composition in osteoblast by label free quantification
Source: Royal Society of Chemistry journal article supplement (doi:10.1039/d0mt00028k), 2020-04-30
Supplement: d0mt00028k5.pdf [file d0mt00028k5.pdf]

Table S1

List of upregulated proteins in presence of Mg was analysed through Gene Ontology (GO) knowledgebase, to describe them in terms of their associated biological processes (dark grey) and molecular functions (light grey). The processes and functions are classified *via* their *term identifier* (ID) and *term description*. *Observed gene count* represent the number of the asked proteins/genes (names can be found under *matching proteins in the network*) in the total number of protein (*background gene count*) contained in the network. *False discovery rate* (FDR) means the probability that a statistically significant result was a false positive. Selection of the term ID was performed when more than 3 proteins were matching with a FDR < 0.05.

|                    | #Term ID           | Term description                              | Observed gene count | Background gene count | False discovery rate                                                                                                                                 | Matching proteins in the network                                                                                                                                                                                                                                                                                                                                                                                                                                                                 |
|--------------------|--------------------|-----------------------------------------------|---------------------|-----------------------|------------------------------------------------------------------------------------------------------------------------------------------------------|--------------------------------------------------------------------------------------------------------------------------------------------------------------------------------------------------------------------------------------------------------------------------------------------------------------------------------------------------------------------------------------------------------------------------------------------------------------------------------------------------|
| Biological process | GO:0009987         | Cellular process                              | 79                  | 14652                 | 6.10E-06                                                                                                                                             | ACTC1,AHNAK,AKR1B1,AKR1C1,ALDH1L2,AMOT,ANKFY1,ANPEP,ARSB,ATP6V1B2,CNN3,COL1A1,COL6A1,COMT,CRTAP,DDX17,DDX5,DYNC1H1,ENO2,EPB41L2,FABP5,FERMT2,FLNA,FLNB,FN1,FUS,GBA,GCN1L1,HIST2H3A,HMGA1,HNRNPA0,HNRNPA3,HNRNPH2,HNRNPM,HNRNPUL1,LEPREL2,LGMN,MAP1A,MAP1B,MAP4,MMP2,MX2,MYH10,MYH14,MYH9,MYO1B,MYOF,NAMPT,NONO,NPC2,P4HA1,P4HA2,PALLD,PEPD,PLEC,PSAT1,PTGIS,RAB23,RBMX,RECQL,RPLP1,RPS9,SERPINE2,SERPINE2,SFPQ,SOD2,SPARC,SPTAN1,SPTBN1,SRDL,TAGLN,TGM2,THY1,TIMP1,TKT,TOLLIP,TRIM28,VDAC1,VDAC2 |
|                    | GO:0071840         | Cellular component organization or biogenesis | 47                  | 5342                  | 6.10E-06                                                                                                                                             | ACTC1,AHNAK,AKR1C1,AMOT,ANKFY1,ARSB,CNN3,COL1A1,COL6A1,DDX17,DYNC1H1,EPB41L2,FERMT2,FLNA,FLNB,FN1,GBA,HIST2H3A,HMGA1,LGMN,MAP1A,MAP1B,MAP4,MMP2,MX2,MYH10,MYH14,MYH9,MYO1B,MYOF,P4HA1,PALLD,PLEC,RAB23,RBMX,RECQL,RPS9,SERPINE2,SFPQ,SOD2,SPARC,SPTAN1,SPTBN1,TGM2,THY1,TIMP1,TRIM28                                                                                                                                                                                                             |
|                    | GO:0000398         | mRNA splicing, via spliceosome                | 11                  | 284                   | 1.77E-05                                                                                                                                             | DDX17,DDX5,FUS,HNRNPA0,HNRNPA3,HNRNPH2,HNRNPM,HNRNPUL1,NONO,RBMX,SFPQ                                                                                                                                                                                                                                                                                                                                                                                                                            |
|                    | GO:0007010         | Cytoskeleton organization                     | 18                  | 953                   | 1.77E-05                                                                                                                                             | ACTC1,AMOT,CNN3,DYNC1H1,EPB41L2,FLNA,FLNB,MAP1A,MAP1B,MAP4,MYH10,MYH14,MYH9,MYO1B,PALLD,SPTAN1,SPTBN1,THY1                                                                                                                                                                                                                                                                                                                                                                                       |
|                    | GO:0009888         | Tissue development                            | 23                  | 1626                  | 2.80E-05                                                                                                                                             | ACTC1,AKR1C1,CNN3,COL1A1,COL6A1,DDX17,DDX5,FABP5,FLNA,FLNB,FN1,MMP2,MYH10,MYH14,PALLD,PTGIS,SERPINE2,TAGLN,TGM2,TIMP1,TOLLIP,TRIM28,VDAC1                                                                                                                                                                                                                                                                                                                                                        |
|                    | GO:0016071         | mRNA metabolic process                        | 14                  | 667                   | 1.50E-04                                                                                                                                             | DDX17,DDX5,FLNA,FUS,HNRNPA0,HNRNPA3,HNRNPH2,HNRNPM,HNRNPUL1,NONO,RBMX,RPLP1,RPS9,SFPQ                                                                                                                                                                                                                                                                                                                                                                                                            |
|                    | GO:0000380         | Alternative mRNA splicing, via spliceosome    | 4                   | 16                    | 2.10E-04                                                                                                                                             | DDX17,DDX5,HNRNPM,SFPQ                                                                                                                                                                                                                                                                                                                                                                                                                                                                           |
|                    | GO:0030036         | Actin cytoskeleton organization               | 11                  | 418                   | 2.10E-04                                                                                                                                             | ACTC1,AMOT,CNN3,EPB41L2,FLNA,FLNB,MYH10,MYH14,MYH9,MYO1B,PALLD                                                                                                                                                                                                                                                                                                                                                                                                                                   |
|                    | GO:0048518         | Positive regulation of biological process     | 41                  | 5459                  | 9.60E-04                                                                                                                                             | ACTC1,AKR1B1,AMOT,ANKFY1,ARSB,COL1A1,COMT,DDX17,DDX5,DYNC1H1,EPB41L2,FABP5,FLNA,FN1,FUS,GBA,GCN1L1,HMGA1,HNRNPA0,LGMN,MAP1A,MAP1B,MMP2,MYH10,MYH9,NAMPT,NONO,PTGIS,RBMX,RPLP1,RPS9,SERPINE2,SFPQ,SOD2,SPARC,SPTBN1,TGM2,THY1,TIMP1,TOLLIP,TRIM28                                                                                                                                                                                                                                                 |
|                    | GO:0065008         | Regulation of biological quality              | 31                  | 3559                  | 1.30E-03                                                                                                                                             | AKR1B1,AKR1C1,AMOT,ANPEP,COL1A1,COMT,CRTAP,FABP5,FERMT2,FLNA,FLNB,FN1,GBA,HIST2H3A,HNRNPA0,LGMN,MAP1A,MAP1B,MYH10,MYH14,MYH9,NPC2,PTGIS,RPS9,SERPINE2,SERPINE2,SOD2,SPTAN1,SPTBN1,TGM2,THY1                                                                                                                                                                                                                                                                                                      |
|                    | GO:0048519         | Negative regulation of biological process     | 38                  | 4953                  | 1.50E-03                                                                                                                                             | ACTC1,AKR1B1,AMOT,COL1A1,COMT,CRTAP,DDX17,DDX5,FABP5,FLNA,FN1,GBA,HIST2H3A,HMGA1,HNRNPA0,LEPREL2,LGMN,MAP1A,MAP1B,MAP4,MYH9,NONO,PTGIS,RAB23,RBMX,RPLP1,RPS9,SERPINE2,SERPINE2,SFPQ,SOD2,SPARC,SPTAN1,SPTBN1,THY1,TIMP1,TRIM28,VDAC2                                                                                                                                                                                                                                                             |
|                    | GO:0007018         | Microtubule-based movement                    | 8                   | 276                   | 1.60E-03                                                                                                                                             | DYNC1H1,MAP1A,MAP1B,MAP4,MYH10,MYH14,MYH9,MYO1B                                                                                                                                                                                                                                                                                                                                                                                                                                                  |
|                    | GO:0042060         | Wound healing                                 | 10                  | 461                   | 1.60E-03                                                                                                                                             | COL1A1,FLNA,FN1,HIST2H3A,MYH10,MYOF,SERPINE2,SERPINE2,SPARC,TIMP1                                                                                                                                                                                                                                                                                                                                                                                                                                |
| GO:0044085         | Cellular component | 25                                            | 2556                | 1.60E-03              | ACTC1,AHNAK,AKR1C1,AMOT,COL1A1,COL6A1,DDX17,DYNC1H1,FERMT2,FLNA,FN1,HIST2H3A,HMGA1,MX2,MYH10,MYO1B,PLEC,RAB23,RBMX,RPS9,SOD2,SPTBN1,TGM2,THY1,TRIM28 |                                                                                                                                                                                                                                                                                                                                                                                                                                                                                                  |

|            |                                                |            |       |          |                                                                                                                                                                                                                                                                                                                                                                                                                                                            |  |
|------------|------------------------------------------------|------------|-------|----------|------------------------------------------------------------------------------------------------------------------------------------------------------------------------------------------------------------------------------------------------------------------------------------------------------------------------------------------------------------------------------------------------------------------------------------------------------------|--|
|            |                                                | biogenesis |       |          |                                                                                                                                                                                                                                                                                                                                                                                                                                                            |  |
| GO:0007044 | Cell-substrate junction assembly               | 4          | 40    | 2.10E-03 | FERMT2, FN1, PLEC, THY1                                                                                                                                                                                                                                                                                                                                                                                                                                    |  |
| GO:0050789 | Regulation of biological process               | 63         | 11116 | 2.10E-03 | ACTC1, AHNAK, AKR1B1, AMOT, ANKFY1, ANPEP, ARSB, ATP6V1B2, COL1A1, COMT, CRTAP, DDX17, DDX5, DYNC1H1, EPB41L2, FABP5, FERMT2, FLNA, FLNB, FN1, FUS, GBA, GCN1L1, HIST2H3A, HMGA1, HNRNPA0, HNRNPM, HNRNPUL1, LEPREL2, LGMN, MAP1A, MAP1B, MAP4, MMP2, MX2, MYH10, MYH14, MYH9, MYL9, MYOF, NAMPT, NONO, NPC2, PTGIS, RAB23, RBMX, RPLP1, RPS9, SERPINB2, SERPINE2, SFPQ, SOD2, SPARC, SPTAN1, SPTBN1, TGM2, THY1, TIMP1, TKT, TOLLIP, TRIM28, VDAC1, VDAC2 |  |
| GO:0051128 | Regulation of cellular component organization  | 23         | 2306  | 2.20E-03 | AMOT, ANKFY1, ARSB, DYNC1H1, FERMT2, FLNA, FN1, GBA, HMGA1, MAP1B, MAP4, MYH10, MYH14, MYH9, SERPINE2, SFPQ, SPARC, SPTAN1, SPTBN1, THY1, TRIM28, VDAC1, VDAC2                                                                                                                                                                                                                                                                                             |  |
| GO:0000904 | Cell morphogenesis involved in differentiation | 10         | 498   | 2.30E-03 | FERMT2, FLNA, FLNB, FN1, MAP1B, MYH10, MYH9, PALLD, SPTAN1, SPTBN1                                                                                                                                                                                                                                                                                                                                                                                         |  |
| GO:0032989 | Cellular component morphogenesis               | 12         | 720   | 2.30E-03 | ACTC1, FERMT2, FLNA, FLNB, FN1, MAP1B, MYH10, MYH14, MYH9, PALLD, SPTAN1, SPTBN1                                                                                                                                                                                                                                                                                                                                                                           |  |
| GO:0030154 | Cell differentiation                           | 29         | 3457  | 0.0031   | ACTC1, AKR1C1, AMOT, ANPEP, ARSB, CNN3, COL1A1, COL6A1, DDX17, DDX5, FERMT2, FLNA, FLNB, FN1, MAP1B, MAP4, MMP2, MYH10, MYH9, MYOF, PALLD, SERPINE2, SPTAN1, SPTBN1, TAGLN, THY1, TOLLIP, TRIM28, VDAC1                                                                                                                                                                                                                                                    |  |
| GO:0050794 | Regulation of cellular process                 | 60         | 10484 | 0.0034   | ACTC1, AHNAK, AKR1B1, AMOT, ANKFY1, ANPEP, ARSB, ATP6V1B2, COL1A1, COMT, CRTAP, DDX17, DDX5, DYNC1H1, FABP5, FERMT2, FLNA, FLNB, FN1, FUS, GBA, GCN1L1, HIST2H3A, HMGA1, HNRNPA0, HNRNPM, HNRNPUL1, LEPREL2, LGMN, MAP1A, MAP1B, MAP4, MMP2, MX2, MYH10, MYH14, MYH9, MYL9, MYOF, NAMPT, NONO, NPC2, PTGIS, RBMX, RPLP1, RPS9, SERPINB2, SERPINE2, SFPQ, SOD2, SPARC, SPTAN1, SPTBN1, TGM2, THY1, TIMP1, TOLLIP, TRIM28, VDAC1, VDAC2                      |  |
| GO:0006887 | Exocytosis                                     | 12         | 774   | 0.0036   | ANPEP, ARSB, DYNC1H1, FABP5, FLNA, FN1, MYH10, NPC2, SPARC, SPTAN1, TIMP1, TOLLIP                                                                                                                                                                                                                                                                                                                                                                          |  |
| GO:0022604 | Regulation of cell morphogenesis               | 9          | 442   | 0.0039   | FERMT2, FLNA, FN1, MAP1B, MYH10, MYH14, MYH9, SPARC, THY1                                                                                                                                                                                                                                                                                                                                                                                                  |  |
| GO:0032963 | Collagen metabolic process                     | 4          | 54    | 0.0039   | COL1A1, LEPREL2, MMP2, PEPD                                                                                                                                                                                                                                                                                                                                                                                                                                |  |
| GO:0048522 | Positive regulation of cellular process        | 36         | 4898  | 0.0039   | AKR1B1, AMOT, ANKFY1, ARSB, COL1A1, COMT, DDX17, DDX5, DYNC1H1, FABP5, FLNA, FN1, FUS, GBA, GCN1L1, HMGA1, LGMN, MAP1B, MMP2, MYH10, MYH9, NAMPT, PTGIS, RAB23, RBMX, RPLP1, RPS9, SERPINE2, SFPQ, SOD2, SPARC, SPTBN1, TGM2, THY1, TIMP1, TOLLIP, TRIM28                                                                                                                                                                                                  |  |
| GO:0006396 | RNA processing                                 | 12         | 825   | 0.0052   | DDX17, DDX5, FUS, HNRNPA0, HNRNPA3, HNRNPH2, HNRNPM, HNRNPUL1, NONO, RBMX, RPS9, SFPQ                                                                                                                                                                                                                                                                                                                                                                      |  |
| GO:0030198 | Extracellular matrix organization              | 7          | 296   | 0.008    | COL1A1, COL6A1, FN1, MMP2, P4HA1, SPARC, TIMP1                                                                                                                                                                                                                                                                                                                                                                                                             |  |
| GO:0030334 | Regulation of cell migration                   | 11         | 753   | 0.0084   | AMOT, ARSB, COL1A1, FLNA, FN1, LGMN, SERPINE2, SOD2, SPARC, THY1, TIMP1                                                                                                                                                                                                                                                                                                                                                                                    |  |
| GO:0008360 | Regulation of cell shape                       | 5          | 143   | 0.0103   | FERMT2, FN1, MYH10, MYH14, MYH9                                                                                                                                                                                                                                                                                                                                                                                                                            |  |
| GO:0044237 | Cellular metabolic process                     | 51         | 8797  | 0.0148   | AKR1B1, AKR1C1, ALDH1L2, ANPEP, ARSB, ATP6V1B2, COMT, CRTAP, DDX17, DDX5, ENO2, FABP5, FLNA, FN1, FUS, GBA, GCN1L1, HIST2H3A, HMGA1, HNRNPA0, HNRNPA3, HNRNPH2, HNRNPM, HNRNPUL1, LEPREL2, LGMN, MMP2, NAMPT, NONO, P4HA1, P4HA2, PEPD, PSAT1, PTGIS, RAB23, RBMX, RECQL, RPLP1, RPS9, SFPQ, SOD2, SPTAN1, SPTBN1, SQRDL, TGM2, THY1, TIMP1, TKT, TOLLIP, TRIM28, VDAC1                                                                                    |  |
| GO:0008152 | Metabolic process                              | 54         | 9569  | 0.0154   | AKR1B1, AKR1C1, ALDH1L2, ANPEP, ARSB, ATP6V1B2, COL1A1, COMT, CRTAP, DDX17, DDX5, ENO2, FABP5, FLNA, FN1, FUS, GBA, GCN1L1, HIST2H3A, HMGA1, HNRNPA0, HNRNPA3, HNRNPH2, HNRNPM, HNRNPUL1, LEPREL2, LGMN, MMP2, MYH9, NAMPT, NONO, NPC2, P4HA1, P4HA2, PEPD, PSAT1, PTGIS, RAB23, RBMX, RECQL, RPLP1, RPS9, SFPQ, SOD2, SPTAN1, SPTBN1, SQRDL, TGM2, THY1, TIMP1, TKT, TOLLIP, TRIM28, VDAC1                                                                |  |
| GO:0007051 | Spindle organization                           | 4          | 123   | 0.028    | DYNC1H1, FLNA, MAP4, MYH9                                                                                                                                                                                                                                                                                                                                                                                                                                  |  |
| GO:0042127 | Regulation of cell population proliferation    | 15         | 1594  | 0.0289   | AKR1B1, COMT, FLNA, FN1, HMGA1, LEPREL2, LGMN, MMP2, NAMPT, RPS9, SERPINE2, SOD2, SPARC, TGM2, TIMP1                                                                                                                                                                                                                                                                                                                                                       |  |

|                           |            |                                    |    |      |          |                                                                                                                                                                                                                                                                                                                          |
|---------------------------|------------|------------------------------------|----|------|----------|--------------------------------------------------------------------------------------------------------------------------------------------------------------------------------------------------------------------------------------------------------------------------------------------------------------------------|
|                           | GO:0048762 | Mesenchymal cell differentiation   | 4  | 130  | 0.0317   | DDX17,DDX5,FN1,TRIM28                                                                                                                                                                                                                                                                                                    |
|                           | GO:0044238 | Primary metabolic process          | 49 | 8808 | 0.0367   | AKR1B1,AKR1C1,ANPEP,ARSB,ATP6V1B2,COMT,CRTAP,DDX17,DDX5,ENO2,FABP5,FLNA,FN1,FUS,GBA,GCN1L1,HIST2H3A,HMGA1,HNRNPA0,HNRNPA3,HNRNPH2,HNRNPM,HNRNPUL1,LEPREL2,LGMN,MMP2,MYH9,NAMPT,NONO,NPC2,P4HA1,P4HA2,PEPD,PSAT1,PTGIS,RAB23,RBMX,RECQL,RPLP1,RPS9,SFPQ,SPTAN1,SPTBN1,TGM2,THY1,TIMP1,TKT,TOLLIP,TRIM28                   |
| <b>Molecular function</b> | GO:0003779 | Actin binding                      | 15 | 413  | 6.94E-08 | CNN3,EPB41L2,FERMT2,FLNA,FLNB,MAP1A,MYH10,MYH14,MYH9,MYO1B,PALLD,PLEC,SPTAN1,SPTBN1,TAGLN                                                                                                                                                                                                                                |
|                           | GO:0008092 | Cytoskeletal protein binding       | 20 | 882  | 7.49E-08 | ACTC1,CNN3,EPB41L2,FERMT2,FLNA,FLNB,FUS,MAP1A,MAP1B,MAP4,MX2,MYH10,MYH14,MYH9,MYO1B,PALLD,PLEC,SPTAN1,SPTBN1,TAGLN                                                                                                                                                                                                       |
|                           | GO:0005515 | Protein binding                    | 51 | 6605 | 4.58E-06 | ACTC1,AHNAK,AMOT,ANKFY1,CNN3,COL1A1,COL6A1,DDX5,DYNC1H1,EPB41L2,FABP5,FERMT2,FLNA,FLNB,FN1,FUS,GBA,GCN1L1,HIST2H3A,HMGA1,HNRNPA0,HNRNPM,HNRNPUL1,MAP1A,MAP1B,MAP4,MX2,MYH10,MYH14,MYH9,MYO1B,NAMPT,NONO,NPC2,P4HA1,P4HA2,RAB23,RECQL,RBMX,SERPINE2,SFPQ,SOD2,SPTAN1,SPTBN1,TAGLN,TGM2,THY1,TIMP1,TKT,TOLLIP,TRIM28,VDAC1 |
|                           | GO:0008017 | Microtubule binding                | 9  | 253  | 9.71E-05 | CNN3,MAP1A,MAP1B,MAP4,MX2,MYH10,MYH14,MYH9,MYO1B                                                                                                                                                                                                                                                                         |
|                           | GO:0005516 | Calmodulin binding                 | 8  | 194  | 1.10E-04 | CNN3,DDX5,MYH10,MYH14,MYH9,MYO1B,SPTAN1,SPTBN1                                                                                                                                                                                                                                                                           |
|                           | GO:0016887 | ATPase activity                    | 10 | 392  | 2.90E-04 | ACTC1,ATP6V1B2,DDX17,DDX5,DYNC1H1,MYH10,MYH14,MYH9,MYO1B,RECQL                                                                                                                                                                                                                                                           |
|                           | GO:0051015 | Actin filament binding             | 7  | 158  | 2.90E-04 | FERMT2,FLNA,MYH10,MYH14,MYH9,MYO1B,TAGLN                                                                                                                                                                                                                                                                                 |
|                           | GO:0043168 | Anion binding                      | 25 | 2696 | 0.0014   | ACTC1,AKR1C1,ANKFY1,ATP6V1B2,DDX17,DDX5,DYNC1H1,FABP5,FERMT2,FN1,LEPREL2,MX2,MYH10,MYH14,MYH9,MYO1B,MYOF,P4HA1,P4HA2,RAB23,RECQL,SERPINE2,SPTBN1,TGM2,THY1                                                                                                                                                               |
|                           | GO:0017111 | Nucleoside-triphosphatase activity | 12 | 778  | 0.0022   | ACTC1,ATP6V1B2,DDX17,DDX5,DYNC1H1,MX2,MYH10,MYH14,MYH9,MYO1B,RAB23,RECQL                                                                                                                                                                                                                                                 |
|                           | GO:0043167 | Ion binding                        | 41 | 6066 | 0.0027   | ACTC1,AKR1C1,ANKFY1,ANPEP,ARSB,ATP6V1B2,COL1A1,COMT,DDX17,DDX5,DYNC1H1,ENO2,FABP5,FERMT2,FN1,FUS,LEPREL2,MMP2,MX2,MYH10,MYH14,MYH9,MYL9,MYO1B,MYOF,P4HA1,P4HA2,PEPD,PTGIS,RAB23,RECQL,SERPINE2,SOD2,SPARC,SPTAN1,SPTBN1,TGM2,THY1,TIMP1,TKT,TRIM28                                                                       |
|                           | GO:0005543 | Phospholipid binding               | 6  | 382  | 0.0421   | ANKFY1,FERMT2,MYO1B,MYOF,SPTBN1,THY1                                                                                                                                                                                                                                                                                     |
