# Supplementary figures and images for: Investigation of the impact of magnesiumversustitanium implants on protein composition in osteoblast by label free quantification
Source: Royal Society of Chemistry journal article supplement (doi:10.1039/d0mt00028k), 2020-04-30

Control0 vs Mg7

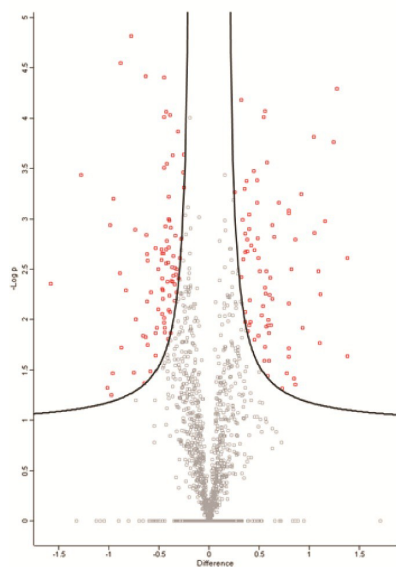

Control7 vs Mg7

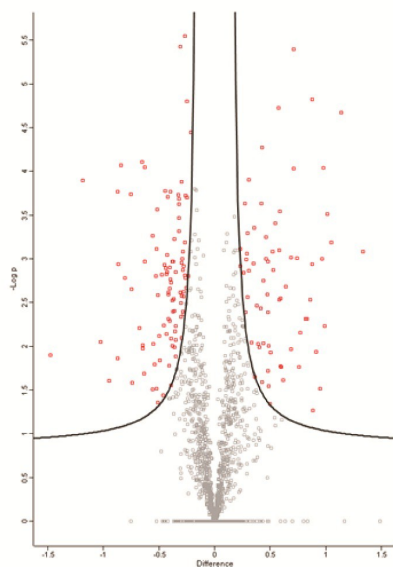

Control0 vs Ti7

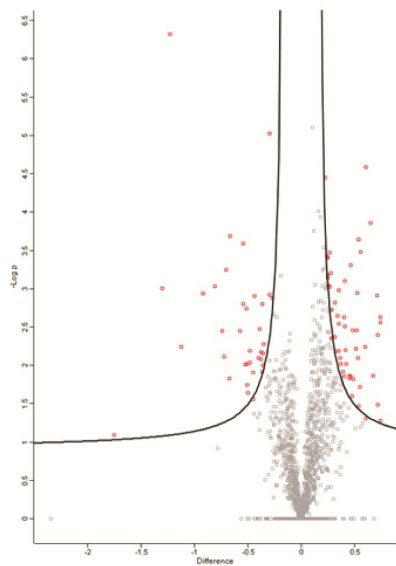

Control7 vs Ti7

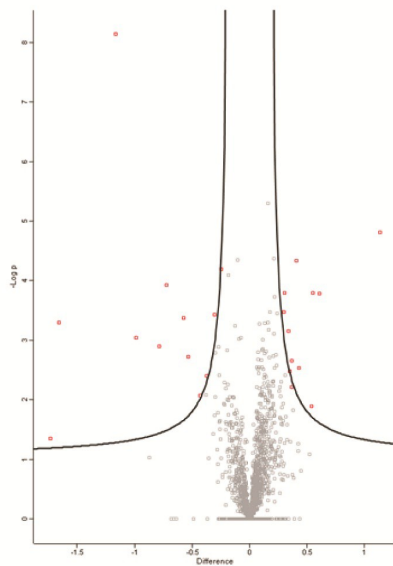

Supplement: d0mt00028k4.pdf [file d0mt00028k4.pdf]
